# Supplementary material for: A simple method to fabricate poly(aniline-co-pyrrole) with highly improved electrical conductivity via pre-polymerization
Source: Royal Society of Chemistry journal article supplement (doi:10.1039/c5ra26469c), 2016-01-01
Supplement: c5ra26469c1.pdf [file c5ra26469c1.pdf]

Supporting Information

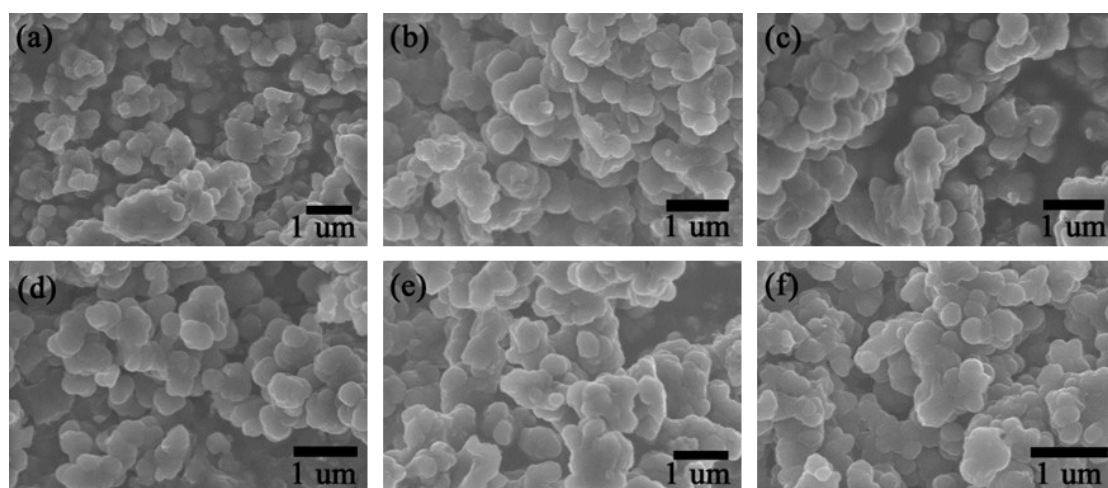

Fig.1. SEM image of the prepared P(1An-1Py) copolymers with different pre-polymerization time: (a) 0 min, (b) 15 min, (c) 30 min, (d) 45 min, (e) 60 min, (f) 120 min.
